# Supplementary material
Source: Springer Nature journal article supplement (https://www.springermedizin.de/resource/supplementary/13012_2008_160_MOESM4_ESM.pdf/9629366)

**Categories of attributes**

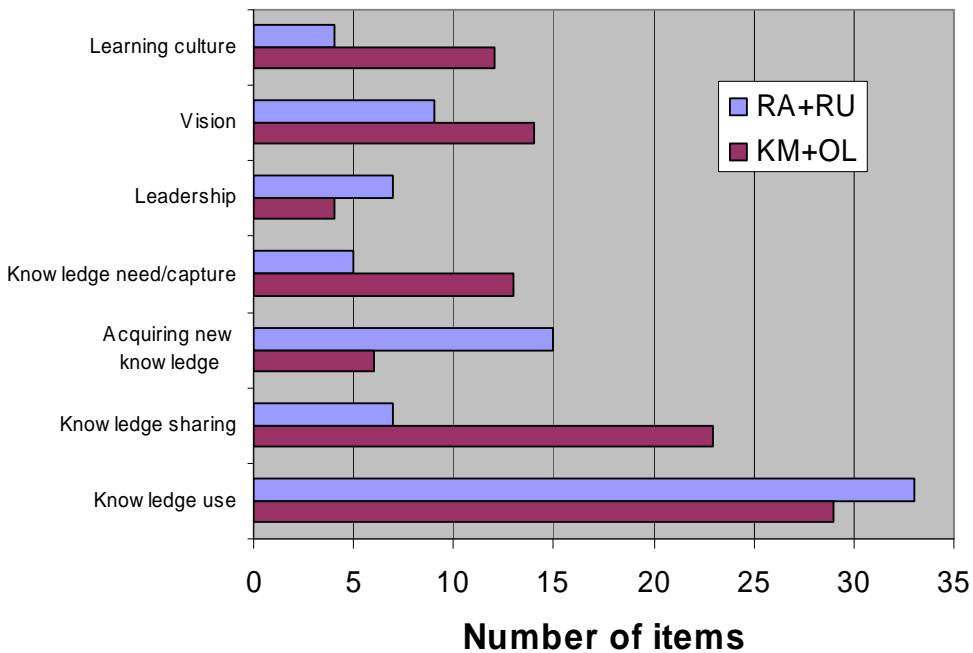

Supplement: MOESM4 [file 9629366]
